# Supplementary material for: Structural engineering brings new electronic properties to Janus ZrSSe and HfSSe monolayers
Source: Royal Society of Chemistry journal article supplement (doi:10.1039/d2cp01928k), 2022-01-01
Supplement: d2cp01928k1.pdf [file d2cp01928k1.pdf]

## Supporting Information

### **Structural engineering brings new electronic properties to Janus ZrSSe and HfSSe monolayers**

Xinxin Wang, Shuhui Zhang, Yuanyuan Wang, Shiqiang Yu, Baibiao Huang, Ying  
Dai,\* and Wei Wei\*

*School of Physics, State Key Laboratory of Crystal Materials, Shandong University,  
Jinan 250100, China*

\* Corresponding authors: [daiy60@sdu.edu.cn](mailto:daiy60@sdu.edu.cn) (Y. Dai), [weiw@sdu.edu.cn](mailto:weiw@sdu.edu.cn) (W. Wei)

**Table S1** Optimized interlayer distance ( $d$ ), binding energy ( $E_b$ ) and band gap ( $E_g$ ) of

|            | AA    | AA'   | AB    | AB'   | A'B   |
|------------|-------|-------|-------|-------|-------|
| $d$ (Å)    | 2.90  | 3.55  | 3.03  | 3.57  | 2.97  |
| $E_b$ (eV) | -1.98 | -1.89 | -1.96 | -1.93 | -2.01 |
| $E_g$ (eV) | 0.68  | 0.65  | 0.61  | 0.53  | 0.55  |

the out-of-plane vdW heterostructures of T-ZrSSe/T-HfSSe.

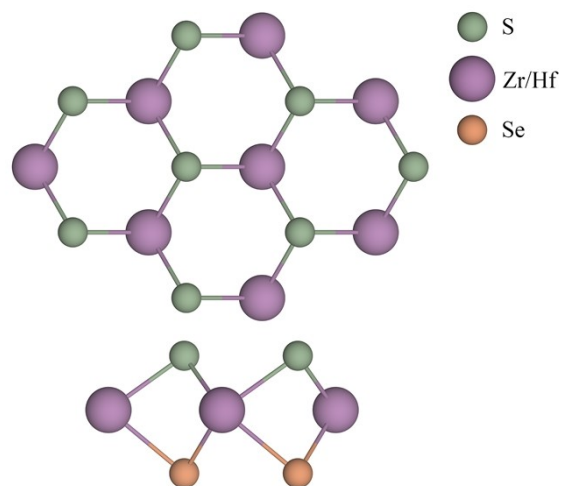

**Figure S1.** Top and side views of atomic structure for H-ZrSSe and H-HfSSe.

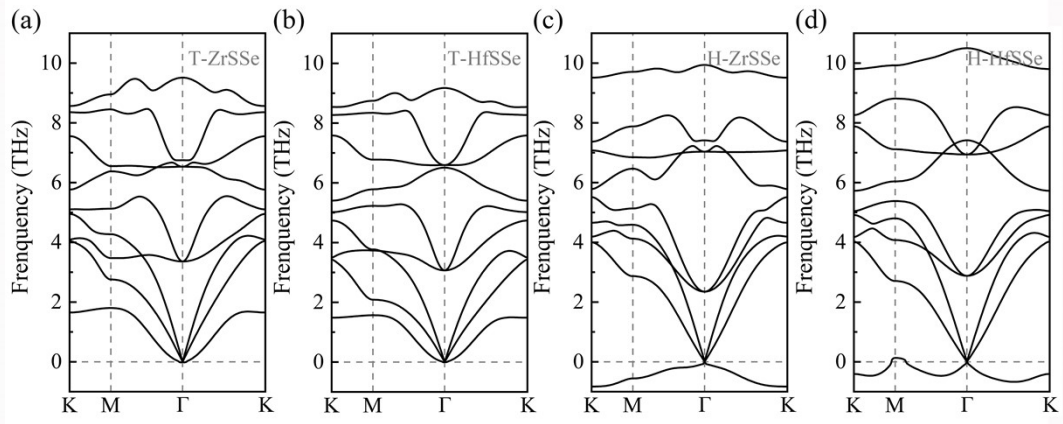

**Figure S2.** Phonon spectrum of (a) T-ZrSSe, (b) T-HfSSe, (c) H-ZrSSe and (d) H-HfSSe.

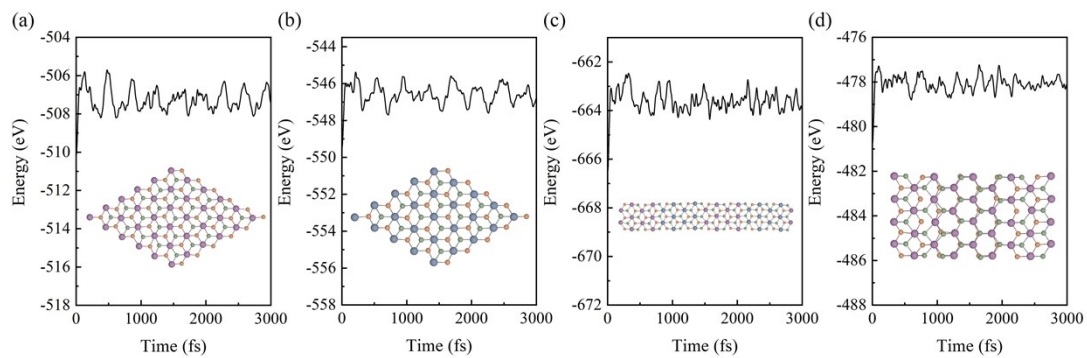

**Figure S3.** AIMD simulation results for (a) T-ZrSSe, (b) T-HfSSe, (c) in-plane heterostructure, (d) electronic heterostructure with 1D phase boundary, at 300 K lasting for 3 ps. Insets are snapshots of the final structures.

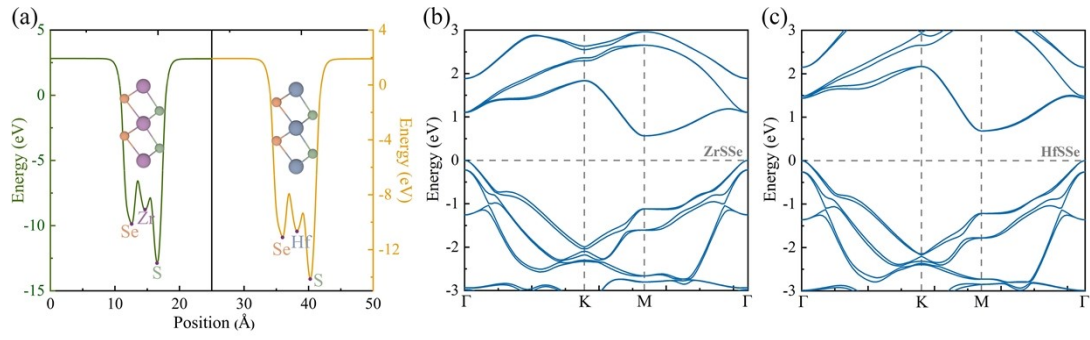

**Figure S4.** (a) Planner-averaged electrostatic potential energy for (a) T-ZrSSe (left) and T-HfSSe (right). Band structure taking SOC into account for (b) T-ZrSSe, and (c) T-HfSSe monolayer, the Fermi level is set to zero.

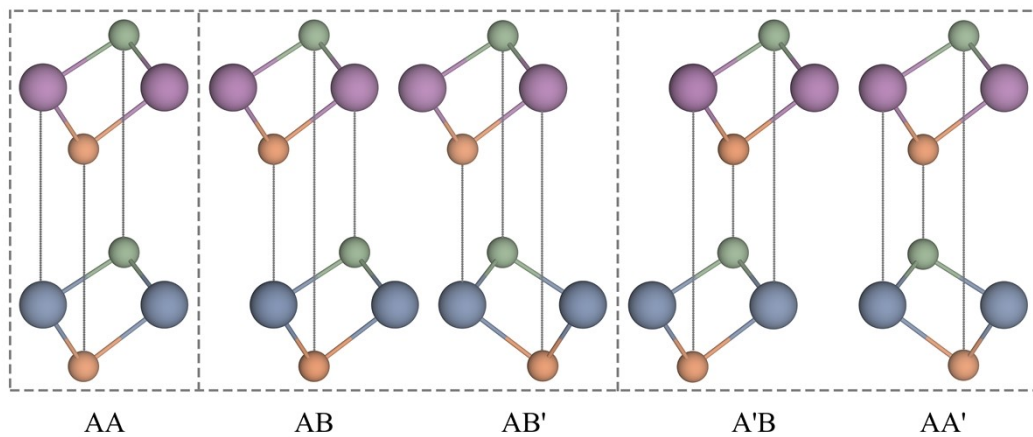

**Figure S5.** Stacking patterns of high-symmetry for out-of-plane vdW heterostructures composed of T-ZrSSe and T-HfSSe.

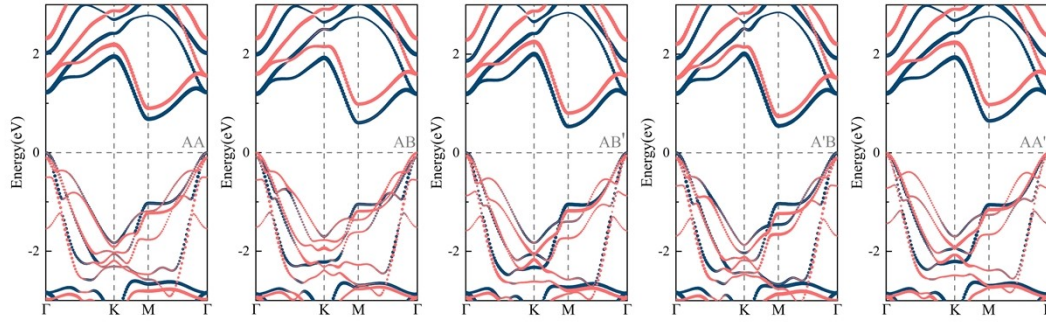

**Figure S6.** Projected band structure for out-of-plane vdW heterostructure composed of T-ZrSSe and T-HfSSe, contributions from T-ZrSSe and T-HfSSe are distinguished by navy-blue and orange dots, respectively. The Fermi level is set to zero.



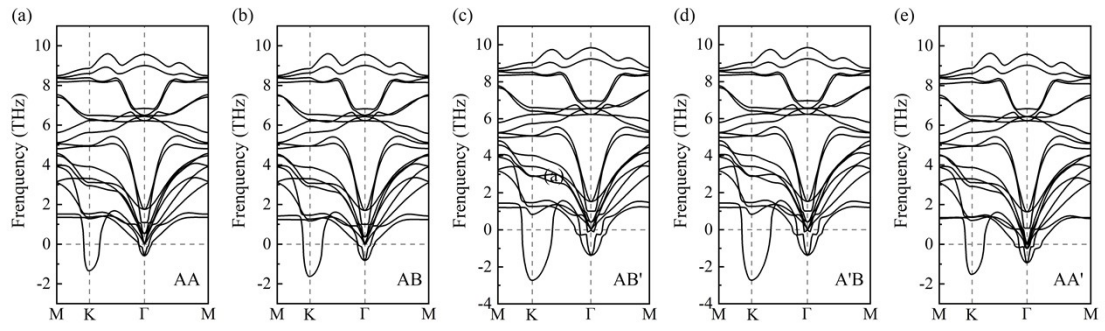

**Figure S7.** Phonon spectrum for out-of-plane heterostructures composed of T-ZrSSe and T-HfSSe of different stacking order: (a) AA, (b) AB, (c) AB', (d) A'B, and (e) AA'.

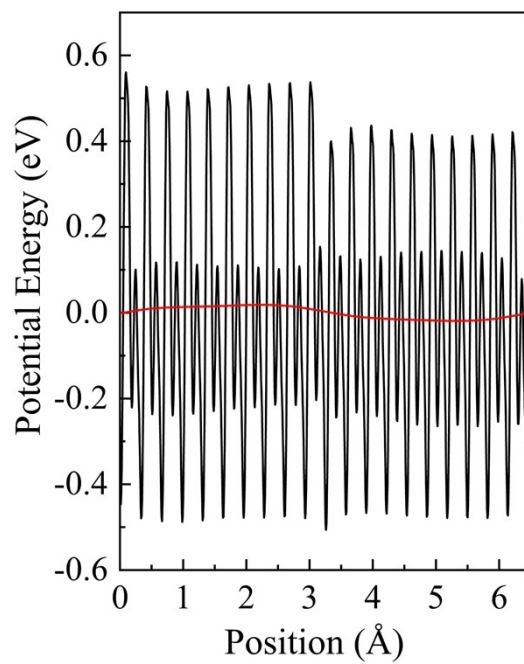

**Figure S8.** Planar-averaged electrostatic potential along the direction perpendicular to the interface for in-plane heterostructures of T-ZrSSe and T-HfSSe ( $n = 10$ ), and the macroscopic-average of the electrostatic potential (red line) is also shown.

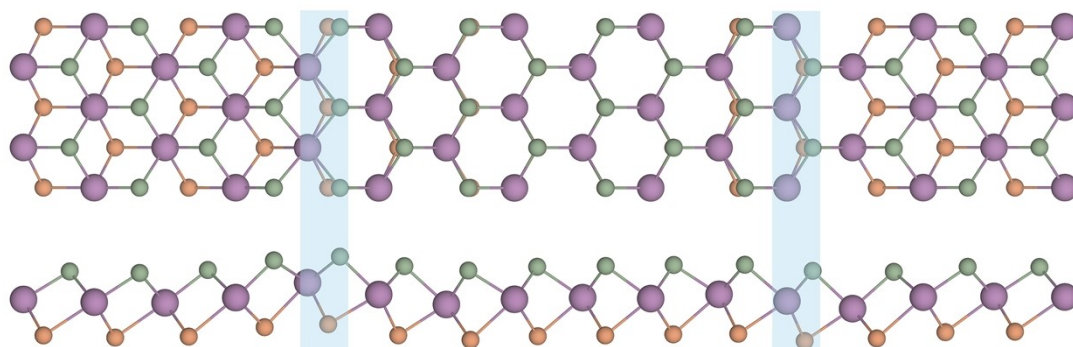

**Figure S9.** Relaxed structure of the electronic heterostructure between T- and H-ZrSSe with the 1D phase boundary along the zigzag direction.

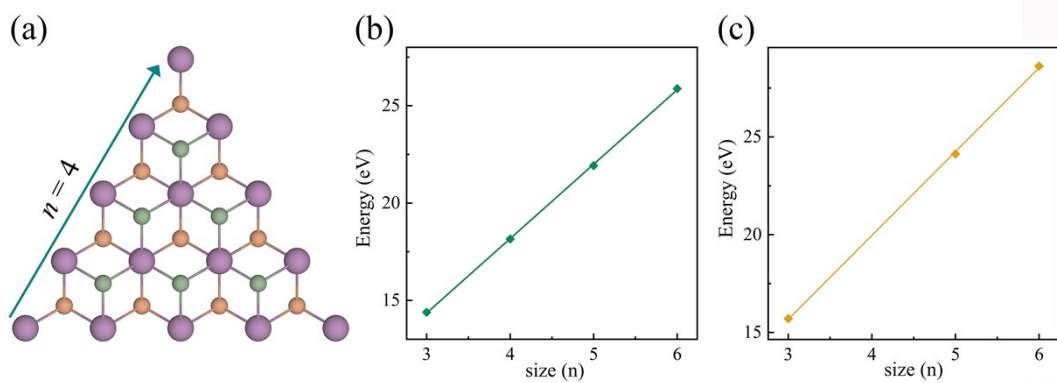

**Figure S10.** (a) Triangular structure used to calculate the edge energy  $\sigma$  of type-I GBs, where  $n$  denotes the number of Se atoms on each edge. Energy of the triangular structure of (b) ZrSSe and (c) HfSSe as a function of  $n$ . In (b) and (c), thus, the slope corresponds to the edge energy  $\sigma$ .

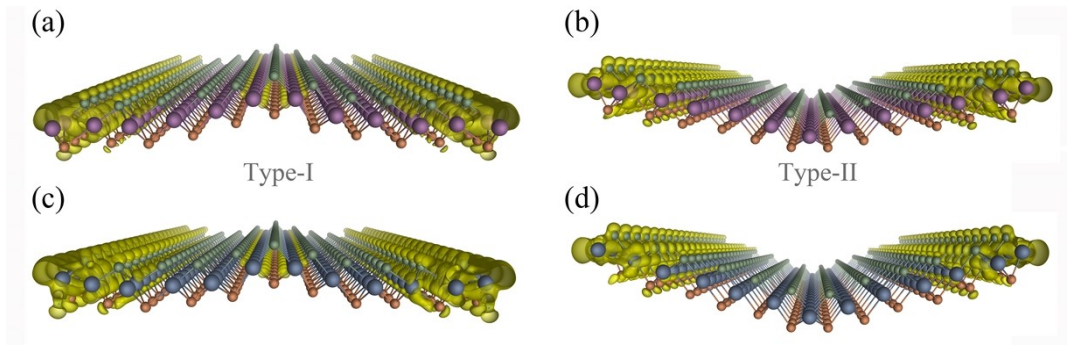

**Figure S11.** Charge density distribution of the states near the Fermi level for GBs of (a) type-I and (b) type-II in T-ZrSSe, and of (c) type-I and (d) type-II in T-HfSSe.
